# Supplementary material for: Selection and Validation of Appropriate Reference Genes for Quantitative RT‐PCR Analysis in Rubia yunnanensis Diels Based on Transcriptome Data
Source: Hindawi journal article supplement (doi:10.1155/2020/5824841), 2020-01-01
Supplement: f1 [file 5824841.f1.zip]

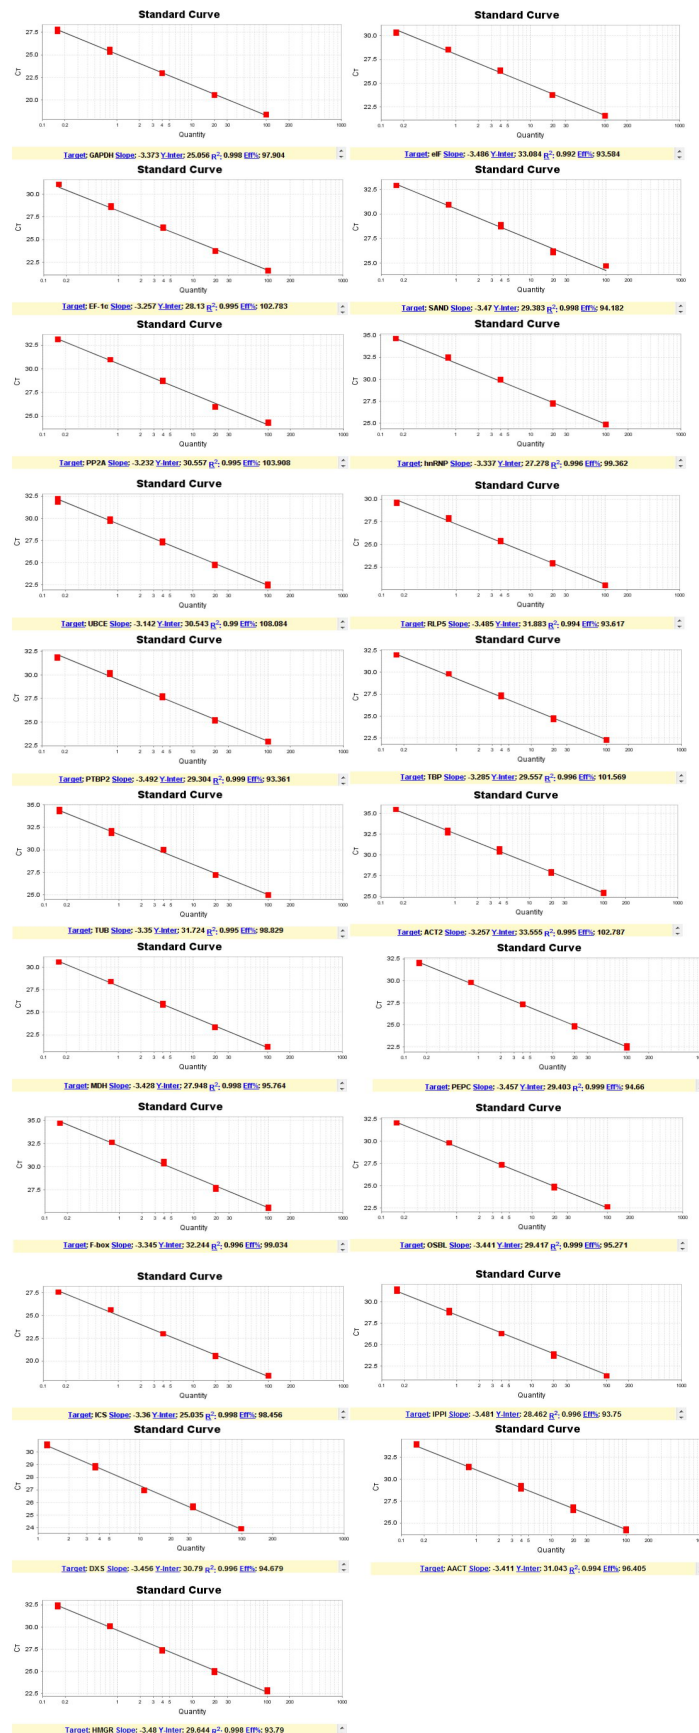

**Supplemental fig. 1** Standard curves of 15 candidate reference genes and six target genes were directly generated by StepOne™ Real-time PCR system.
