# Supplementary material for: Selection and Validation of Appropriate Reference Genes for Quantitative RT-PCR Analysis in Rubia yunnanensis Diels Based on Transcriptome Data
Source: Biomed Res Int. 2020 Jan 8;2020:5824841. doi: 10.1155/2020/5824841 (PMC6973195; doi:10.1155/2020/5824841)
Supplement: Supplementary Materials — Additional Figure S1: standard curves of 15 candidate reference genes and six target genes were directly generated by StepOne™ Real-time PCR system. Additional File 1: sequence information of 15 candidate reference genes and six target genes selected from R. yunnanensis transcriptome database. Table S1: information of 15 candidate reference genes and six target genes selected for evaluation and validation based on R. yunnanensis transcriptome database. Table S2: raw Ct values in R. yunnanensis. Table S3: expression stability ranking of the 15 candidate reference genes estimated by geNorm, NormFinder, BestKeeper, and RefFinder. [file 5824841.f1.zip › 5824841.f1/Additional Table S1.xls]

## Sheet: Sheet1
		Table S1 Information of 15 candidate reference genes and 6 target genes selected for evaluation and validation based on R. yunnanensis transcriptome database
		Candidate gene name abbreviation	Query ID	Subject ID	Identity	Alignment length	Mismatch	Gap	Qstart	Qend	Sstart	Send	E-value	Score	R1.FPKM	R2.FPKM	R3.FPKM	SL1.FPKM	SL2.FPKM	SL3.FPKM	Fold Change	Description
		GAPDH	TRINITY_DN128429_c0_g3	gi|356562585|ref|XP_003549550.1|	93.67	474	30	0	252	1673	3	476	0	894.804	18.35	39.26	16.47	89.02	112.92	83.35	3.2264	PREDICTED: NADP-dependent glyceraldehyde-3-phosphate dehydrogenase [Glycine max]
		eIF	TRINITY_DN126396_c2_g1	gi|1025275408|ref|XP_016494095.1|	90.82	425	39	0	51	1325	30	454	0	816.224	41.51	47.87	64.13	36.53	65.19	56.93	0.847293	PREDICTED: eukaryotic translation initiation factor 3 subunit D-like, partial [Nicotiana tabacum]
		EF-1α	TRINITY_DN129819_c4_g5	gi|209922600|gb|ACI96243.1|	99.24	262	2	0	2	787	58	319	0	542.732	816.11	952.08	1080.08	444.05	649.04	503.65	0.461668	elongation factor 1-alpha [Prunus persica]
		SAND	TRINITY_DN125814_c0_g2	gi|673576847|gb|AIK35211.1|	75.65	308	75	31	3	926	145	421	8.14e-148	447.973	5.43	8.03	8.18	9.28	9.05	10.81	0.988971	SAND family protein, partial [Camellia sinensis]
		PP2A	TRINITY_DN126743_c0_g1	gi|747048868|ref|XP_011070459.1|	79.72	360	73	1	460	1539	24	382	0	599.742	24.83	30.83	30.83	22.44	44.91	34.26	0.990693	serine/threonine-protein phosphatase 2A activator [Sesamum indicum]
		hnRNP	TRINITY_DN124701_c0_g3	gi|747101975|ref|XP_011099132.1|	82.16	370	66	12	89	1180	1	364	0	570.852	9.99	28.9	14.72	11.62	16.4	57.02	0.868914	heterogeneous nuclear ribonucleoprotein A1-like 2 [Sesamum indicum]
		UBCE	TRINITY_DN121669_c0_g1	gi|1109253968|ref|XP_019150830.1|	92.35	183	14	0	282	830	1	183	1.95e-122	354.369	24.88	21.41	19.67	19.61	50.51	21.48	1.18216	PREDICTED: ubiquitin-conjugating enzyme E2 4 [Ipomoea nil]
		RPL5	TRINITY_DN126708_c1_g5	gi|470101387|ref|XP_004287154.1|	84.54	291	45	0	96	968	1	291	3.65e-162	468.774	66.01	86.33	92.66	75.62	107.74	95.63	0.940369	PREDICTED: 60S ribosomal protein L5 [Fragaria vesca subsp. vesca]
		PTBP2	TRINITY_DN127362_c2_g1	gi|565367867|ref|XP_006350576.1|	98.28	174	3	0	57	578	1	174	7.2e-113	334.339	33.89	40.41	42.19	45.24	55.26	47.34	0.903427	PREDICTED: polypyrimidine tract-binding protein homolog 2 [Solanum tuberosum]
		TBP	TRINITY_DN124467_c0_g1	gi|564587141|gb|AHB86968.1|	98.8	167	2	0	326	826	34	200	6.68e-116	336.65	27.81	26.35	22.6	60.64	65.58	28.42	1.7181	TATA binding protein [Sedum alfredii]
		TUB	TRINITY_DN124981_c0_g1	gi|747056058|ref|XP_011074284.1|	97.89	474	10	0	128	1549	1	474	0	977.237	14.57	13.95	16.19	6.76	5.63	4.8	0.312959	tubulin gamma-1 chain [Sesamum indicum]
		ACT2	TRINITY_DN130195_c6_g3	gi|1109194223|ref|XP_019184000.1|	89.011	364	40	0	2	1093	22	385	0	696	19.21	22.74	29.44	25.32	26.36	40.79	1.08366	PREDICTED: actin-related protein 2 [Ipomoea nil]
		MDH	TRINITY_DN124081_c2_g8	gi|1026034152|ref|XP_016563241.1|	83.98	412	66	0	304	1539	1	412	0	672.544	24.96	30.69	23.13	22.18	23.62	19.62	0.692105	PREDICTED: malate dehydrogenase, chloroplastic [Capsicum annuum]
		PEPC	TRINITY_DN125879_c3_g1	gi|747056076|ref|XP_011074293.1|	87.13	668	86	15	145	2124	4	664	0	1131.32	143.5	137.21	129.5	36.18	61.81	42.51	0.278643	phosphoenolpyruvate carboxykinase (ATP) [Sesamum indicum]
		F-box	TRINITY_DN128389_c2_g1	gi|698501504|ref|XP_009796451.1|	75.41	370	91	8	36	1145	1	362	0	560.836	48.22	77.7	75.94	44.36	30.25	37.39	0.477	PREDICTED: F-box protein At1g67340 [Nicotiana sylvestris]
		IPPI	TRINITY_DN131965_c2_g1	gi|937985355|gb|ALJ06892.1|	100	220	0	0	182	841	15	234	3.96531e-163	460.299	146.6	154.73	203.9	46.82	47.54	73.58	0.332	isopentenyl-diphosphate delta-isomerase I [Rubia cordifolia]
		HMGR	TRINITY_DN129754_c4_g1	gi|661888810|emb|CDP07253.1|	83.7	540	88	29	376	1953	46	570	0	899.042	42.95	105.51	50.77	4	9.94	3.62	0.029	3-hydroxy-3-methylglutaryl-coenzyme A reductase 1[Coffea canephora]
		DXS	TRINITY_DN124410_c3_g1	gi|854938462|gb|AKN79613.1|	86.77	567	75	2	963	2663	8	572	0	1011.52	121.99	155.5	154.19	85.44	64.67	80.6	0.178	DXS [Gardenia jasminoides]
		AACT	TRINITY_DN130086_c0_g2	gi|661877162|emb|CDP18953.1|	92.33	378	29	1	466	1599	1	377	0	712.605	50.99	43.15	65.51	21.48	30.35	29.17	0.507	Acetyl-CoA acetyltransferase, cytosolic 1 [Coffea canephora]
		OSBL	TRINITY_DN125216_c2_g1	gi|937985474|gb|ALJ06893.1|	86.52	460	62	25	1847	3223	73	508	0	812.372	623.56	1128.75	601.55	48.28	56.45	39.52	0.061	o-succinylbenzoate-CoA ligase [Rubia cordifolia]
		ICS	TRINITY_DN125672_c2_g2	gi|307563162|gb|ABK79678.2|	99.7	329	1	0	333	1319	246	574	0	676.011	87.28	205.22	79.64	2.98	0.74	3.38	0.019	isochorismate synthase [Rubia cordifolia]
		Note: Query ID: the assembled gene ID; Subject ID: the protein sequence on the gene alignment in the database ID; Identity: consistency; Alignment length: alignment protein sequence length; Qstart: the starting location of the gene alignment; Qend: the stop position of the gene alignment; Sstart: the relative start position of the protein sequence on the gene alignment; Send: the relative stop po…
