# Supplementary material for: Selection and Validation of Appropriate Reference Genes for Quantitative RT-PCR Analysis in Rubia yunnanensis Diels Based on Transcriptome Data
Source: Biomed Res Int. 2020 Jan 8;2020:5824841. doi: 10.1155/2020/5824841 (PMC6973195; doi:10.1155/2020/5824841)
Supplement: Supplementary Materials — Additional Figure S1: standard curves of 15 candidate reference genes and six target genes were directly generated by StepOne™ Real-time PCR system. Additional File 1: sequence information of 15 candidate reference genes and six target genes selected from R. yunnanensis transcriptome database. Table S1: information of 15 candidate reference genes and six target genes selected for evaluation and validation based on R. yunnanensis transcriptome database. Table S2: raw Ct values in R. yunnanensis. Table S3: expression stability ranking of the 15 candidate reference genes estimated by geNorm, NormFinder, BestKeeper, and RefFinder. [file 5824841.f1.zip › 5824841.f1/Additional Table S2.xls]

## Sheet: Sheet1
	Table S2 Raw Ct values in R. yunnanensis
		TBP	TUB	SAND	ACT2	RLP5	GAPDH	hnRNP	eIF	EF-1α	PP2A	UBCE	PTBP2	MDH	PEPC	F-box
	PEG	22.92	26.93	26.3	25.11	21.83	21.87	25.21	22.63	18.7	23.97	21.19	23.92	24.89	20.46	23.92
		22.84	26.87	26.23	24.96	21.88	21.77	25.28	22.62	18.78	24.59	21.19	23.93	24.74	20.43	23.96
		22.87	26.92	25.93	25.02	21.8	21.82	25.23	22.61	18.77	23.92	21.18	23.91	24.78	20.46	23.91
		22.8	27.18	26.15	24.93	21.93	21.72	25.53	22.92	18.69	24.59	21.69	24.57	24.93	20.94	23.51
		22.85	27.23	25.93	24.91	21.92	21.76	25.43	22.96	18.71	24.6	21.69	24.48	24.95	20.93	23.54
		22.8	27.18	26.1	24.94	21.94	21.7	25.46	22.93	18.72	24.6	21.8	24.5	24.93	20.97	23.56
		22.12	27.28	25.45	24.88	21.61	20.93	24.94	22.49	17.93	23.92	20.93	23.93	24.32	19.84	23.49
		22.11	27.23	25.57	24.8	21.63	20.89	24.91	22.51	17.95	23.9	20.97	23.93	24.3	19.8	23.52
		22.06	27.29	25.46	24.95	21.76	20.83	24.95	22.5	17.97	23.87	20.96	23.95	24.28	19.76	23.49
	NaCl	22.97	26.93	25.16	24.19	21.63	20.93	23.81	21.97	17.95	24.69	20.93	23.27	23.93	19.91	23.92
		22.95	26.96	25.26	24.11	21.66	20.93	23.92	21.98	17.96	24.74	20.97	23.27	23.93	19.87	23.96
		22.92	26.88	24.96	24.12	21.6	20.97	23.92	21.97	17.93	24.71	20.94	23.26	23.97	19.92	23.91
		23.7	27.68	26.21	24.84	22.33	23.31	24.82	23.93	18.87	25.85	21.93	24.93	24.85	20.45	23.51
		23.69	27.71	25.93	24.93	22.33	23.36	24.75	23.94	18.84	25.86	21.89	24.94	24.83	20.48	23.54
		23.64	27.73	26.11	24.78	22.33	23.33	24.73	23.97	18.92	25.86	21.88	24.95	24.85	20.46	23.56
		23.58	27.69	25.3	25.35	21.95	22.59	24.54	23.8	18.65	25.93	21.63	24.51	24.2	20.94	23.49
		23.53	27.57	25.44	25.28	21.93	22.57	24.5	23.79	18.64	25.95	21.73	24.54	24.14	20.78	23.52
		23.49	27.56	25.34	25.29	21.97	22.55	24.47	23.74	18.65	25.88	21.63	24.5	24.16	20.75	23.49
	CuSO4	22.93	27.01	26.74	24.94	20.93	23.95	23.81	23	18.5	23.84	21.78	25.17	24.8	20.9	23.95
		22.89	27	26.43	24.91	20.9	23.9	23.8	23.01	18.52	23.93	21.78	25.21	24.94	20.91	23.94
		22.87	27.03	26.41	24.92	20.93	23.89	23.82	23.02	18.53	23.87	21.77	25.12	24.9	20.96	23.92
		24.33	29.28	27.82	26.77	22.62	25.17	25.33	24.83	19.89	25.26	23.94	27.94	25.97	22.48	23.5
		24.17	29.28	27.52	26.61	22.57	25.93	25.38	24.19	19.9	25.2	23.96	27.97	25.96	22.63	23.48
		24.2	29.36	27.37	26.68	22.56	25.13	25.31	24.94	19.9	25.18	23.94	27.92	25.98	22.47	23.45
		23.51	26.94	27.37	25.82	22.32	25.44	24.93	24.23	19.8	25.48	22.77	27.84	25.84	22.39	23.62
		23.44	26.9	27.16	25.56	22.23	25.47	24.94	24.15	19.79	25.5	22.77	27.8	25.82	22.22	23.77
		23.46	26.84	26.93	25.64	22.28	25.54	24.94	24.42	19.93	25.5	22.78	27.78	25.9	22.26	23.66
	H2O2	21.7	26.84	24.78	24.49	18.93	24.46	23.74	22.18	17.93	22.96	20.9	22.88	21.76	19.95	17.58
		21.59	26.75	24.93	24.41	18.89	24.43	23.58	22.24	17.98	22.89	20.93	22.93	21.75	19.97	17.6
		21.57	26.77	24.6	24.38	18.89	24.43	23.58	22.18	17.96	22.8	20.93	22.93	21.73	19.95	17.58
		22.33	27.75	25.71	24.95	19.69	25.76	24.34	22.92	18.5	22.77	21.25	23.41	22.15	19.93	17.89
		22.31	27.63	25.66	24.89	19.69	25.82	24.32	22.88	18.49	22.72	21.2	23.41	22.1	19.97	17.9
		22.25	27.63	25.88	24.91	19.66	25.75	24.26	22.89	18.48	22.68	21.23	23.4	22.11	19.95	17.91
		21.93	27.28	24.55	23.93	19.24	24.93	23.92	22.1	17.34	23.06	20.49	22.92	21.71	20.2	17.9
		21.8	27.33	24.81	24.35	19.21	24.92	23.81	22.06	17.31	23.01	20.41	22.84	21.93	20.24	17.93
		21.78	27.42	24.58	24.32	19.18	24.92	23.79	22.08	17.37	22.93	20.45	22.85	21.76	20.15	17.91
	SA	23.93	28.93	25.91	27.63	22.24	27.56	24.93	24.91	21.23	24.76	23.21	26.75	26.95	23.93	24.89
		23.93	28.7	25.91	27.51	22.24	27.47	24.89	24.95	21.25	24.9	23.22	26.85	26.98	23.98	24.97
		23.95	28.88	25.81	27.53	22.2	27.55	24.89	24.93	21.22	24.74	23.18	26.75	26.94	23.98	24.92
		24.37	28.98	26.96	26.84	21.98	25.35	24.87	23.46	20.39	26.93	24.88	25.6	26.28	22.16	27.91
		24.57	28.93	26.94	26.62	21.93	25.93	24.82	23.49	20.36	26.92	24.93	25.82	26.17	22.26	27.92
		24.32	28.79	26.93	26.79	21.91	25.3	24.82	23.56	20.41	26.89	24.85	25.93	26.24	22.2	27.93
		22.61	26.56	25.22	25.93	21.15	26.63	23.89	23.24	18.95	23.39	22.32	24.71	25.91	20.8	26.81
		22.5	26.48	25.08	25.95	21.18	26.52	23.49	23.17	18.95	23.34	22.34	24.74	25.93	20.78	26.8
		22.46	26.44	25.15	25.98	21.15	26.46	23.55	23.19	18.93	23.32	22.31	24.7	25.88	20.77	26.92
	MeJA	22.38	27.59	25.93	26.86	20.85	26.5	24.93	23.84	19.71	23.84	22.47	25.59	23.93	21.86	24.93
		22.35	27.14	25.95	26.83	20.95	26.55	24.86	23.97	19.76	23.92	22.45	25.64	23.9	21.85	24.92
		22.36	27.17	25.76	26.88	20.84	26.5	24.82	23.88	19.71	23.91	22.41	25.54	23.95	21.86	24.88
		22.88	26.92	26.16	27.78	22.17	27.8	25.44	24.95	20.93	24.27	22.93	26.93	25.9	22.87	25.92
		22.93	26.87	25.98	27.79	22.12	27.79	25.35	24.92	20.97	24.25	22.94	26.97	25.9	22.89	25.94
		22.89	26.92	26.15	27.8	22.13	27.73	25.36	24.92	20.95	24.33	22.95	26.93	25.91	22.9	25.93
		22.83	26.93	25.94	26.94	21.92	27.95	25.25	24.68	20.25	24.64	22.89	25.87	25.55	21.91	24.63
		22.82	26.86	25.93	26.95	21.93	27.96	25.2	24.64	20.31	24.55	22.9	25.85	25.45	21.97	24.68
		22.78	26.82	25.9	26.92	21.95	27.93	25.17	24.7	20.25	24.58	22.92	25.86	25.51	21.96	24.59
	Cold	24.46	29.74	29.33	27.98	23.53	26.93	24.91	24.9	20.93	25.92	24.86	26.94	26.68	23.91	24.31
		24.54	28.9	29.28	27.92	23.52	26.91	24.93	24.96	20.96	25.75	24.93	26.85	26.61	23.96	24.33
		24.43	29.65	29.16	27.93	23.53	26.9	24.97	24.9	20.93	25.73	24.91	26.9	26.59	23.92	24.29
		23.14	27.93	26.94	27.22	22.15	24.52	23.69	22.8	19.59	24.52	23.86	25.51	24.92	22.86	22.96
		23.91	27.8	26.96	27.31	22.16	24.44	23.65	22.78	19.59	24.38	23.84	25.44	24.93	22.86	22.97
		23.13	27.79	26.78	27.24	22.16	24.44	23.71	22.82	19.57	24.34	23.84	25.4	24.93	22.87	22.92
		23.94	28.65	28.05	27.28	22.95	25.63	24.57	23.92	20.53	25.37	24.32	26.26	25.47	23.64	23.52
		23.93	28.7	28.19	27.36	22.93	25.57	24.55	23.95	20.56	25.4	24.26	26.17	25.48	23.68	23.58
		23.96	28.31	28.17	27.29	22.95	25.62	24.57	23.91	20.54	25.16	24.27	26.04	25.45	23.66	23.55
	Hot	22.98	25.89	27.16	27.17	21.91	26.43	23.81	22.5	18.94	24.09	22.95	23.47	24.18	23.92	22.97
		22.93	25.84	27.12	27.16	21.92	26.4	23.93	22.52	18.81	23.93	22.93	23.57	24.13	23.97	22.93
		22.93	25.95	26.93	27.12	21.87	26.36	23.8	22.55	18.83	23.91	22.98	23.58	24.15	23.95	22.92
		24.14	27.75	29.65	29.4	23.42	28.94	25.32	23.28	20.18	24.95	24.59	24.45	27.17	23.12	23.35
		24.11	27.77	29.49	29.63	23.34	28.9	25.32	23.23	20.11	24.71	24.63	24.45	27.1	23.1	23.27
		24.18	27.69	29.31	29.33	23.41	28.93	25.28	23.24	20.01	24.68	24.59	24.47	27.18	23.11	23.3
		23.05	26.93	27.36	26.93	21.96	26.6	23.72	22.93	18.95	24.04	22.91	23.82	23.98	23.78	22.62
		23.11	26.92	27.3	26.94	21.93	26.49	23.74	22.95	18.93	23.95	22.86	23.76	23.93	23.82	22.76
		23.09	26.86	27.18	26.95	21.97	26.51	23.74	22.94	18.49	23.93	22.88	23.93	23.95	23.76	22.57
	Tissue	21.92	24.93	25.56	22.93	20.98	22.93	23.29	21.3	17.63	24.44	21.41	22.65	23.79	21.97	21.66
		21.9	24.9	25.69	22.92	20.93	22.94	23.32	21.31	17.61	24.3	21.44	22.67	23.82	21.91	21.67
		21.91	24.89	25.26	22.91	20.86	22.94	23.34	21.34	17.62	24.24	21.47	22.67	23.81	21.94	21.63
		22.12	25.28	25.93	22.57	21.73	22.9	23.96	21.98	17.93	25.57	21.1	22.93	23.93	22.35	22.45
		22.11	25.23	25.67	22.53	22.73	22.88	23.98	21.96	17.92	25.6	21.11	22.96	23.87	22.31	22.41
		22.11	25.35	25.85	22.53	22.93	22.85	23.93	21.92	17.91	25.41	21.08	22.97	23.84	22.33	22.46
		22.17	24.53	25.42	23.93	19.32	24.34	23.62	21.6	17.15	23.95	20.94	22.5	21.62	19.65	21.92
		22.13	24.49	25.56	23.74	19.29	24.31	23.58	21.54	17.14	23.92	20.94	22.38	21.63	19.69	21.8
		22.06	24.48	25.41	23.71	19.24	24.24	23.66	21.56	17.13	23.87	20.95	22.4	21.62	19.69	21.76
		22.68	28.15	27.93	24.16	22.61	22.97	24.53	23.52	19.9	24.65	21.93	23.95	23.93	22.27	23.93
		22.62	28.08	27.96	24.08	22.62	22.93	24.52	23.52	19.95	24.76	21.96	23.97	23.88	22.24	23.93
		22.62	28.18	27.55	24.13	22.56	22.92	24.54	23.51	19.93	24.6	21.93	23.98	23.9	22.27	23.89
		22.97	28.4	28.16	24.43	22.93	23.58	25.35	24.34	20.74	24.92	21.53	24.82	24.77	22.71	24.24
		22.93	28.37	27.77	24.35	22.91	23.6	25.32	24.3	20.73	24.92	21.5	24.93	24.66	22.72	24.14
		22.93	28.26	27.98	24.37	22.92	23.54	25.3	24.28	20.75	24.92	21.47	24.85	24.67	22.7	24.17
		22.29	27.93	26.81	24.93	21.79	23.62	23.93	22.92	19.62	23.79	21.64	23.73	23.26	21.92	23.56
		22.4	27.93	26.97	24.92	21.87	23.62	23.96	22.98	19.59	23.69	21.65	23.75	23.22	21.93	23.62
		22.27	27.93	26.83	24.91	21.81	23.6	23.95	22.97	19.64	23.71	21.63	23.75	23.24	21.92	23.62
		23.24	28.31	21.76	24.93	22.27	22.97	24.01	25.03	19.92	24.82	21.52	24.28	23.94	22.91	24.88
		23.15	28.35	21.78	24.83	22.3	22.93	24.05	25.08	19.97	24.92	21.87	24.34	23.89	22.83	24.87
		23.14	28.25	21.82	24.82	22.27	22.96	24.01	25.04	19.93	24.76	21.45	24.32	23.94	22.83	24.84
		24.23	28.93	22.04	26.63	23.81	23.97	25.5	26.2	21.35	25.94	21.78	25.93	25.94	23.73	24.93
		24.09	29.01	22.02	26.57	23.83	24	25.4	26.44	21.34	25.81	21.77	25.95	25.94	23.76	24.88
		24.01	29.03	22.04	26.57	23.87	23.97	25.32	26.32	21.37	25.76	21.7	25.98	25.94	23.71	24.92
		25.93	30.55	23.89	27.75	24.9	26.56	26.96	27.94	22.65	26.78	23.94	27.51	26.28	23.91	27.54
		25.98	30.52	23.93	27.66	24.96	26.55	26.94	27.96	22.63	26.64	23.76	27.69	26.27	23.86	27.52
		25.98	30.36	23.92	27.72	24.93	26.55	26.93	27.92	22.63	26.57	23.67	27.61	26.24	23.8	27.54
