# Supplementary material for: Selection and Validation of Appropriate Reference Genes for Quantitative RT-PCR Analysis in Rubia yunnanensis Diels Based on Transcriptome Data
Source: Biomed Res Int. 2020 Jan 8;2020:5824841. doi: 10.1155/2020/5824841 (PMC6973195; doi:10.1155/2020/5824841)
Supplement: Supplementary Materials — Additional Figure S1: standard curves of 15 candidate reference genes and six target genes were directly generated by StepOne™ Real-time PCR system. Additional File 1: sequence information of 15 candidate reference genes and six target genes selected from R. yunnanensis transcriptome database. Table S1: information of 15 candidate reference genes and six target genes selected for evaluation and validation based on R. yunnanensis transcriptome database. Table S2: raw Ct values in R. yunnanensis. Table S3: expression stability ranking of the 15 candidate reference genes estimated by geNorm, NormFinder, BestKeeper, and RefFinder. [file 5824841.f1.zip › 5824841.f1/Additional Table S3.xls]

## Sheet: Sheet1
		Table S3 Expression stability ranking of the 15 candidate reference genes estimated by geNorm, NormFinder, BestKeeper and RefFinder
		Method	Ranking order (The 1 st is the most stable, and the 15 th is the least stable)
			1	2	3	4	5	6	7	8	9	10	11	12	13	14	15
		group set	Toatl
		geNorm	TBP	PP2A	hnRNP	RPL5	EF-1α	eIF	TUB	MDH	PTBP2	UBCE	PEPC	ACT2	SAND	GAPDH	F-box
		NormFinder	TBP	EF-1α	UBCE	MDH	RPL5	hnRNP	PTBP2	eIF	PP2A	PEPC	TUB	ACT2	SAND	GAPDH	F-box
		BestKeeper	hnRNP	TBP	PP2A	TUB	RPL5	SAND	eIF	MDH	UBCE	PTBP2	ACT2	PEPC	EF-1α	F-box	GAPDH
		RefFinder	TBP	hnRNP	EF-1α	PP2A	RPL5	UBCE	MDH	eIF	TUB	PTBP2	PEPC	SAND	ACT2	GAPDH	F-box
		group set	PEG
		geNorm	hnRNP	eIF	UBCE	PTBP2	MDH	RPL5	PP2A	SAND	TBP	ACT2	GAPDH	PEPC	F-box	TUB	EF-1α
		NormFinder	hnRNP	eIF	RPL5	MDH	UBCE	SAND	ACT2	PTBP2	TBP	PP2A	F-box	GAPDH	PEPC	TUB	EF-1α
		BestKeeper	ACT2	RPL5	TUB	eIF	hnRNP	F-box	MDH	SAND	PTBP2	UBCE	PP2A	TBP	GAPDH	EF-1α	PEPC
		RefFinder	hnRNP	MDH	eIF	RPL5	TBP	EF-1α	ACT2	SAND	UBCE	PTBP2	TUB	F-box	PP2A	GAPDH	PEPC
		group set	NaCl
		geNorm	EF-1α	UBCE	hnRNP	TUB	TBP	RPL5	MDH	SAND	PP2A	PEPC	ACT2	PTBP2	eIF	GAPDH	F-box
		NormFinder	EF-1α	UBCE	hnRNP	TUB	TBP	RPL5	MDH	SAND	PEPC	PP2A	PTBP2	ACT2	eIF	GAPDH	F-box
		BestKeeper	F-box	RPL5	TUB	TBP	hnRNP	MDH	SAND	PEPC	ACT2	UBCE	EF-1α	PP2A	PTBP2	eIF	GAPDH
		RefFinder	EF-1α	UBCE	hnRNP	TUB	TBP	RPL5	MDH	F-box	PEPC	PP2A	SAND	ACT2	PTBP2	eIF	GAPDH
		group set	CuSO4
		geNorm	RPL5	PEPC	hnRNP	EF-1α	MDH	PP2A	eIF	GAPDH	TBP	SAND	ACT2	UBCE	PTBP2	TUB	F-box
		NormFinder	hnRNP	RPL5	PEPC	EF-1α	MDH	TBP	eIF	ACT2	SAND	PP2A	UBCE	GAPDH	PTBP2	TUB	F-box
		BestKeeper	F-box	SAND	MDH	TBP	hnRNP	ACT2	PP2A	eIF	GAPDH	PEPC	RPL5	EF-1α	UBCE	TUB	PTBP2
		RefFinder	hnRNP	RPL5	PEPC	MDH	EF-1α	TBP	SAND	eIF	F-box	ACT2	PP2A	GAPDH	UBCE	PTBP2	TUB
		group set	H2O2
		geNorm	TBP	RPL5	hnRNP	MDH	eIF	ACT2	UBCE	PTBP2	SAND	TUB	F-box	EF-1α	GAPDH	PEPC	PP2A
		NormFinder	hnRNP	TBP	MDH	RPL5	eIF	ACT2	TUB	UBCE	F-box	PTBP2	SAND	EF-1α	GAPDH	PEPC	PP2A
		BestKeeper	PP2A	PEPC	MDH	F-box	PTBP2	hnRNP	ACT2	TBP	TUB	UBCE	RPL5	eIF	SAND	GAPDH	EF-1α
		RefFinder	PTBP2	hnRNP	TBP	MDH	RPL5	F-box	PEPC	eIF	ACT2	PP2A	TUB	UBCE	SAND	EF-1α	GAPDH
		group set	MeJA
		geNorm	RPL5	MDH	ACT2	hnRNP	PTBP2	eIF	EF-1α	TBP	TUB	SAND	PEPC	UBCE	GAPDH	PP2A	F-box
		NormFinder	hnRNP	RPL5	TBP	ACT2	MDH	PTBP2	EF-1α	SAND	TUB	eIF	UBCE	PEPC	GAPDH	PP2A	F-box
		BestKeeper	MDH	RPL5	ACT2	hnRNP	SAND	GAPDH	PTBP2	eIF	TBP	TUB	UBCE	EF-1α	F-box	PEPC	PP2A
		RefFinder	RPL5	MDH	hnRNP	ACT2	TBP	PTBP2	EF-1α	SAND	eIF	TUB	GAPDH	UBCE	PEPC	PP2A	F-box
		group set	SA
		geNorm	TBP	UBCE	hnRNP	eIF	EF-1α	ACT2	PEPC	SAND	PP2A	RPL5	PTBP2	F-box	GAPDH	MDH	TUB
		NormFinder	eIF	hnRNP	TBP	EF-1α	UBCE	ACT2	PEPC	RPL5	SAND	PP2A	PTBP2	GAPDH	F-box	MDH	TUB
		BestKeeper	SAND	TUB	hnRNP	UBCE	TBP	PP2A	ACT2	eIF	PEPC	F-box	PTBP2	EF-1α	GAPDH	RPL5	MDH
		RefFinder	TBP	hnRNP	UBCE	eIF	SAND	EF-1α	ACT2	PEPC	PP2A	TUB	RPL5	PTBP2	F-box	GAPDH	MDH
		group set	Cold
		geNorm	hnRNP	F-box	RPL5	PTBP2	PP2A	EF-1α	PEPC	UBCE	MDH	TBP	TUB	ACT2	eIF	SAND	GAPDH
		NormFinder	hnRNP	PTBP2	F-box	RPL5	PP2A	EF-1α	MDH	UBCE	PEPC	TUB	eIF	TBP	ACT2	SAND	GAPDH
		BestKeeper	ACT2	TBP	UBCE	PEPC	hnRNP	PTBP2	F-box	TUB	PP2A	RPL5	MDH	EF-1α	SAND	eIF	GAPDH
		RefFinder	RPL5	PTBP2	hnRNP	EF-1α	F-box	PP2A	UBCE	PEPC	ACT2	TBP	MDH	TUB	eIF	SAND	GAPDH
		group set	Hot
		geNorm	RPL5	hnRNP	UBCE	EF-1α	TBP	PP2A	PTBP2	eIF	F-box	TUB	SAND	GAPDH	ACT2	MDH	PEPC
		NormFinder	RPL5	hnRNP	EF-1α	TBP	UBCE	PP2A	PTBP2	TUB	eIF	F-box	SAND	ACT2	GAPDH	MDH	PEPC
		BestKeeper	F-box	eIF	PEPC	PTBP2	PP2A	TBP	TUB	hnRNP	RPL5	EF-1α	UBCE	SAND	ACT2	GAPDH	MDH
		RefFinder	RPL5	hnRNP	TBP	EF-1α	UBCE	F-box	PP2A	eIF	PTBP2	TUB	PEPC	SAND	GAPDH	ACT2	MDH
		group set	Tissue
		geNorm	TBP	hnRNP	PP2A	MDH	PEPC	UBCE	RPL5	F-box	EF-1α	ACT2	TUB	eIF	PTBP2	GAPDH	SAND
		NormFinder	hnRNP	TBP	MDH	EF-1α	RPL5	UBCE	F-box	PEPC	ACT2	PP2A	TUB	GAPDH	eIF	PTBP2	SAND
		BestKeeper	UBCE	PP2A	GAPDH	hnRNP	PEPC	TBP	MDH	ACT2	PTBP2	RPL5	F-box	TUB	SAND	EF-1α	eIF
		RefFinder	PTBP2	hnRNP	TBP	EF-1α	UBCE	MDH	F-box	PP2A	PEPC	RPL5	GAPDH	ACT2	TUB	eIF	SAND
		Note: The top five most stable genes in all groups with the number of occurrences were hnRNP for 37 times, TBP for 26 times, RPL5 for 25 times, MDH for 18 times and EF-1α for 17 times, respectively. Among them, the situation of BestKeeper were hnRNP for 8 times, TBP for 5 times, RPL5 for 4 times. The top five least stable genes in all groups with the number of occurrences were GAPDH for 36 times,…
